# Supplementary material for: Multidimensional analysis of sedentary behaviour and participation in Spanish stroke survivors (Part&Sed-Stroke): a protocol for a longitudinal multicentre study
Source: PubMed Central journal article supplement — BMJ Open. 2023 Feb 15;13(2):e065628. doi: 10.1136/bmjopen-2022-065628 (PMC9933767; doi:10.1136/bmjopen-2022-065628), 2023-02-15
Supplement: bmjopen-2022-065628supp001.pdf [file bmjopen-2022-065628supp001.pdf]

| SPAIN REGION    | CITY                   | CENTER NAME                                      |
|-----------------|------------------------|--------------------------------------------------|
| Andalucía       | Granada                | AGREDACE (A)                                     |
| Andalucía       | San Lucar de barrameda | Freelance Physiotherapist (B)                    |
| Andalucía       | Sevilla                | INEURO (C)                                       |
| Aragón          | Huesca                 | AENO (D)                                         |
| Aragón          | Huesca                 | Hospital Provincial Sagrado Corazón de Jesús (E) |
| Aragón          | Huesca                 | Hospital Universitario San Jorge (F)             |
| Aragón          | Zaragoza               | AIDA (G)                                         |
| Aragón          | Zaragoza               | Grupo 5 CIAN Zaragoza (H)                        |
| Aragón          | Zaragoza               | Rehabilitación El Carmen (I)                     |
| Castilla y León | Burgos                 | ASPAYM (J)                                       |
| Castilla y León | Valladolid             | CIRON (K)                                        |
| Cataluña        | Esplugues de Llobregat | NeuroEsplugues (L)                               |
| Cataluña        | San Cugat del Vallés   | Clínica de neurorrehabilitación (M)              |
| Galicia         | A Coruña               | ADACECO (N)                                      |
| Galicia         | Ferrol                 | NEURAXIS (O)                                     |
| Madrid          | Collado Villalba       | Fundación Pita López (P)                         |
| Madrid          | Madrid                 | Freelance Physiotherapist (Q)                    |
| Navarra         | Pamplona               | Grupo 5 CIAN Navarra (R)                         |
| Navarra         | Pamplona               | CENNER (S)                                       |
| País Vasco      | Vitoria                | NEUFIS (T)                                       |

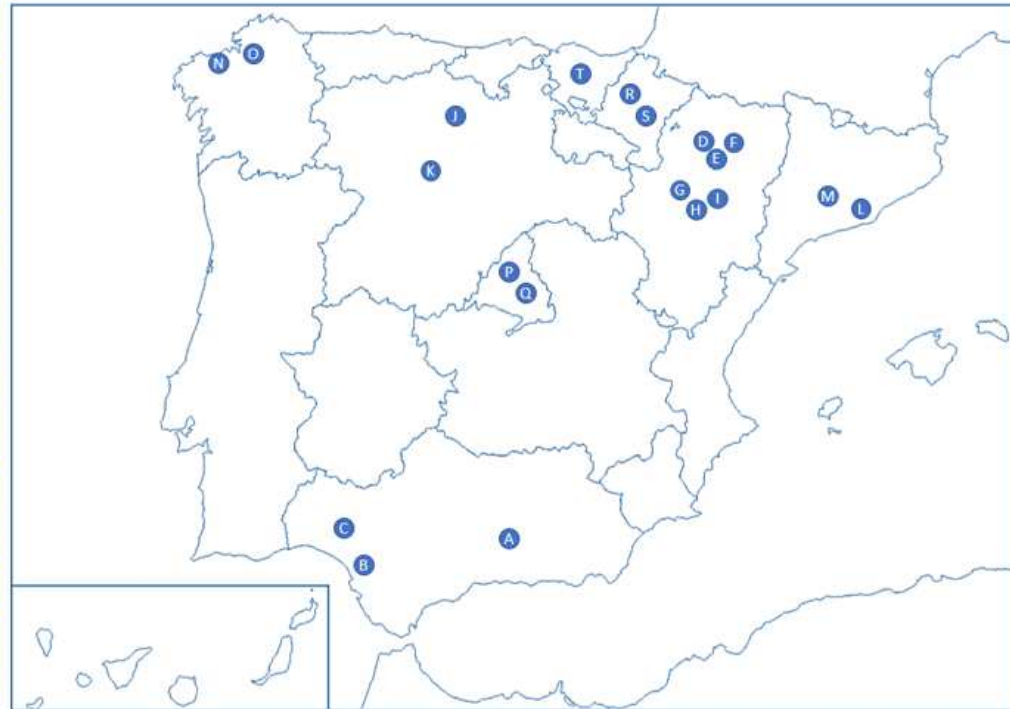

**Supplementary material 1.** List of participating centres in relation to their geographical location in Spain.
